# Supplementary material for: Eyestalk transcriptome analysis reveals sexually dimorphic host-parasite interactions: divergent molecular strategies of Polyascus sp. for reproductive and growth regulation in Eriocheir sinensis
Source: PeerJ journal article supplement (doi:10.7717/peerj.20089), 2025-10-06
Supplement: Supplemental_Data_S2.xlsx [file Supplemental_Data_S2.xlsx]

## Sheet: E2
	48	32	16	8	4
	2.779	1.903	1.114	0.556	0.182
	2.854	1.8852	0.984	0.34	0.189
	2.8165	1.8941	1.049	0.448	0.1855
	inf-female				control-female				control-male				inf-male
repeat1（OD450）	0.25	0.215	0.193	0.194	0.251	0.272	0.295	0.344	0.184	0.138	0.203	0.195	0.178	0.174	0.213	0.173
repeat2（OD450）	0.232	0.236	0.184	0.186	0.249	0.258	0.287	0.318	0.19	0.112	0.197	0.182	0.196	0.17	0.209	0.162
average OD450	0.241	0.2255	0.1885	0.19	0.25	0.265	0.291	0.331	0.187	0.125	0.2	0.1885	0.187	0.172	0.211	0.1675
sample concentration	20.3801	19.0709	15.9459	16.0726	21.1402	22.4071	24.603	27.9814	15.8193	10.5828	16.9172	15.9459	15.8193	14.5524	17.8463	14.1723

## Sheet: T
	6	4	2	1	0.5	standard sample concentration
	3.098	2.358	0.739	0.337	0.137	repeat1（OD450）
	2.792	2.177	0.668	0.288	0.138	repeat2（OD450）
	2.945	2.2675	0.7035	0.3125	0.1375	average OD450
	control-female				inf-female				inf-male				control-male
repeat1（OD450）	0.13	0.126	0.133	0.131	0.189	0.181	0.155	0.107	0.441	0.426	0.429	0.336	0.506	0.51	0.671	0.484
repeat2（OD450）	0.135	0.115	0.125	0.153	0.201	0.177	0.128	0.116	0.428	0.429	0.438	0.347	0.518	0.496	0.68	0.479
average OD450	0.1325	0.1205	0.129	0.142	0.195	0.179	0.1415	0.1115	0.4345	0.4275	0.4335	0.3415	0.512	0.503	0.6755	0.4815
sample concentration	2.99825	2.89336	2.96766	3.08129	3.54458	3.40472	3.07692	2.81469	5.63811	5.57692	5.62937	4.82517	6.31556	6.23689	7.74476	6.04895

## Sheet: ecdysterone
	600	400	200	100	50	standard sample concentration
	2.787	1.663	1.065	0.576	0.263	repeat1（OD450）
	2.19	1.836	1.026	0.623	0.242	repeat2（OD450）
	2.4885	1.7495	1.0455	0.5995	0.2525	average OD450
	inf-male				control-male				inf-female				control-female
repeat1（OD450）	0.366	0.393	0.463	0.468	0.444	0.501	0.552	0.536	0.475	0.451	0.44	0.36	0.492	0.51	0.466	0.523
repeat2（OD450）	0.383	0.353	0.442	0.414	0.471	0.518	0.503	0.513	0.482	0.431	0.402	0.304	0.503	0.495	0.482	0.497
average OD450	0.3745	0.373	0.4525	0.441	0.4575	0.5095	0.5275	0.5245	0.4785	0.441	0.421	0.332	0.4975	0.5025	0.474	0.51
sample concentration	53.641	53.2564	73.641	70.6923	74.9231	88.2564	92.8718	92.1026	80.3077	70.6923	65.5641	42.7436	85.1795	86.4615	79.1538	88.3846
