# Supplementary material for: Eyestalk transcriptome analysis reveals sexually dimorphic host-parasite interactions: divergent molecular strategies of Polyascus sp. for reproductive and growth regulation in Eriocheir sinensis
Source: PeerJ journal article supplement (doi:10.7717/peerj.20089), 2025-10-06
Supplement: Supplemental_Data_S10.xlsx [file Supplemental_Data_S10.xlsx]

## Sheet: Sheet1
		male normal			male parasitized			female normal			female parasitized				male SD	female SD
		c1	c2	c3	t1	t2	t3	c4	c5	c6	t4	t5	t6
Dib	Cq	27.59	27.02	27.62	28.12	28.44	28.04	28.64	27.97	28.35	29.03	28.97	28.78
	△Cq	9.03667	8.46667	9.06667	9.99667	10.3167	9.91667	10.19	9.52	9.9	10.8367	10.7767	10.5867
	△Cq average(normal control)	8.85667						9.87
	—△△Cq	-1.14	-1.46	-1.06				-0.966667	-0.906667	-0.716667					0.21166	0.130512
HR38	Cq	28.99	28.23	29.07	29.54	30.03	29.72	29.53	29.24	29.37	30.1	29.89	29.94
	△Cq	10.4367	9.67667	10.5167	11.4167	11.9067	11.5967	11.03	10.74	11.02	11.85	11.71	11.79
	△Cq average(normal control)	10.21						10.93
	—△△Cq	-1.20667	-1.69667	-1.38667				-0.92	-0.78	-0.86					0.247857	0.0702377
GST	Cq	20.22	20.33	20.5	19.12	19.34	19.54	21.13	20.27	20.46	19.89	19.56	19.77
	△CT	1.66667	1.77667	1.94667	0.996667	1.21667	1.41667	2.63	1.82	2.01	1.69667	1.36667	1.57667
	△Cq average(normal control)	1.79667						2.15333
	—△△Cq	0.8	0.58	0.38				0.456667	0.786667	0.576667					0.210079	0.167033
CYP2L1	Cq	28.21	28.35	28.68	28.51	28.89	29.12	29.03	28.87	28.93	29.04	29.2	29.2
	△Cq	9.65667	9.79667	10.1267	10.3867	10.7667	10.9967	10.58	10.42	10.48	10.8467	11.0067	11.0067
	△Cq average(normal control)	9.86						10.4933
	—△△Cq	-0.526667	-0.97	-0.87				-0.353333	-0.513333	-0.513333					0.23253	0.092376
PGDS	Cq	18.27	18.34	19.01	17.23	17.15	17.69	17.87	18.24	17.97	17.23	16.98	17.33
	△Cq	-0.283333	-0.213333	0.456667	-0.893333	-0.973333	-0.433333	-0.63	-0.21	-0.48	-0.963333	-1.21333	-0.863333
	△Cq average(normal control)	-0.0133333						-0.44
	—△△Cq	0.88	0.96	0.42				0.523333	0.773333	0.423333					0.291433	0.180278
β-actin	Cq	18.72	18.33	18.61	18.29	17.72	18.36	18.5	18.5	18.35	18.25	18.18	18.15
	average	18.5533			18.1233			18.45			18.1933
