# Supplementary material for: Eyestalk transcriptome analysis reveals sexually dimorphic host-parasite interactions: divergent molecular strategies of Polyascus sp. for reproductive and growth regulation in Eriocheir sinensis
Source: PeerJ journal article supplement (doi:10.7717/peerj.20089), 2025-10-06
Supplement: Supplemental_Data_S11.xls [file Supplemental_Data_S11.xls]

## Sheet: Sheet1
ITEM TO CHECK	IMPORTANCE	CHECKLIST
EXPERIMENTAL DESIGN
Definition of experimental and control groups	E	line 102-106
Number within each group	E	3, line 102-106
Assay carried out by core lab or investigator's lab?	D
Acknowledgement of authors' contributions	D
SAMPLE
Description	E	Eriocheir sinensis eyestalks, line 102-106
Volume/mass of sample processed	D
Microdissection or macrodissection	E	macrodissection, line 101
Processing procedure	E	line 100
If frozen - how and how quickly?	E	frozen in liquid nitrogen for half an hour,then moved to -80°C, refer to line 100
If fixed - with what, how quickly?	E	no fixed
Sample storage conditions and duration (especially for FFPE samples)	E	line 109
NUCLEIC ACID EXTRACTION
Procedure and/or instrumentation	E	line 111
Name of kit and details of any modifications	E	no kit
Source of additional reagents used	D
Details of DNase or RNAse treatment	E	Use of RNase-free tips and centrifuge tubes, etc.DEPC treatment for all materials, according to the company's SOP, line 113
Contamination assessment (DNA or RNA)	E	line 112
Nucleic acid quantification	E	line111
Instrument and method	E	line111
Purity (A260/A280)	D
Yield	D
RNA integrity method/instrument	E	line112
RIN/RQI or Cq of 3' and 5' transcripts	E	line112
Electrophoresis traces	D
Inhibition testing (Cq dilutions, spike or other)	E	not avaliable
REVERSE TRANSCRIPTION
Complete reaction conditions	E	Refer to the kit instruction(line 146)
Amount of RNA and reaction volume	E	500 ng,4 µl 4*gDNA mix, Rnase-free ddH2O uo to 16 µl, 42℃ for 2 minutes;then add 4 µl 5*HiScript III qRT SuperMix,incubate in 37℃ for 15 minutes, 85℃ for 5 seconds; according to the manufacturer's protocols,line 146
Priming oligonucleotide (if using GSP) and concentration	E	5*HiScript III qRT SuperMix contains Random primers/Oligo(dT)20 VN primer mix ,according to the manufacturer's protocols,line 146
Reverse transcriptase and concentration	E	MLV, included in 5*HiScript III qRT SuperMix，according to the manufacturer's protocols,line 146
Temperature and time	E	37℃ for 15 minutes, 85℃ for 5 seconds，according to the manufacturer's protocols,line 146
Manufacturer of reagents and catalogue numbers	D
Cqs with and without RT	D*
Storage conditions of cDNA	D
qPCR TARGET INFORMATION
If multiplex, efficiency and LOD of each assay.	E	not multiplex
Sequence accession number	E	line 151, shown in table1
Location of amplicon	D
Amplicon length	E	PGDS:141bp; CYP2L1:217bp;GST: 192bp; HR38: 279bp; Dib: 183bp， shown in table1
In silico specificity screen (BLAST, etc)	E	line 151
Pseudogenes, retropseudogenes or other homologs?	D
Sequence alignment	D
Secondary structure analysis of amplicon	D
Location of each primer by exon or intron (if applicable)	E	exon ,line 151
What splice variants are targeted?	E	no
qPCR OLIGONUCLEOTIDES
Primer sequences	E	line 151, shown in table1
RTPrimerDB Identification Number	D
Probe sequences	D**
Location and identity of any modifications	E	no modification, line 151
Manufacturer of oligonucleotides	D
Purification method	D
qPCR PROTOCOL
Complete reaction conditions	E	line 154 in the manuscript
Reaction volume and amount of cDNA/DNA	E	refer to the kit instruction(line 154),2 µl cDNA
Primer, (probe), Mg++ and dNTP concentrations	E	0.4µl of each primer(10µM); Mg++ and dNTP concentrations depend on the reagent components( AceQ qPCR SYBR Green Master Mix) in the kit, line 154
Polymerase identity and concentration	E	depend on the reagent components( AceQ qPCR SYBR Green Master Mix) in the kit,line 154
Buffer/kit identity and manufacturer	E	line 154 in the manuscript
Exact chemical constitution of the buffer	D
Additives (SYBR Green I, DMSO, etc.)	E	SYBR Green I, added in AceQ qPCR SYBR Green Master Mix，line154
Manufacturer of plates/tubes and catalog number	D
Complete thermocycling parameters	E	refer to the kit instruction, line 154 in the manuscript
Reaction setup (manual/robotic)	D
Manufacturer of qPCR instrument	E	Bio-rad, line152
qPCR VALIDATION
Evidence of optimisation (from gradients)	D
Specificity (gel, sequence, melt, or digest)	E	not avaliable
For SYBR Green I, Cq of the NTC	E	not avaliable
Standard curves with slope and y-intercept	E	use 2-ΔΔCq method,line 158
PCR efficiency calculated from slope	E	use 2-ΔΔCq method,,line 158
Confidence interval for PCR efficiency or standard error	D
r2 of standard curve	E	use 2-ΔΔCq method，line 158
Linear dynamic range	E	use 2-ΔΔCq method，line 158
Cq variation at lower limit	E	not avaliable
Confidence intervals throughout range	D
Evidence for limit of detection	E	not avaliable
If multiplex, efficiency and LOD of each assay.	E	not avaliable
DATA ANALYSIS
qPCR analysis program (source, version)	E	use 2-ΔΔCq method，line 158
Cq method determination	E	Ct
Outlier identification and disposition	E	well repeat detection, remove Outliers，line154
Results of NTCs	E	shown in supplemental data s9
Justification of number and choice of reference genes	E	β-actin served as the reference gene，line50
Description of normalisation method	E	ΔCq=target gene Cq - average Cq of β-actin; ΔΔCq=parasitized sample Cq - average ΔCq of normal sample control ，shown in supplemental data s9
Number and concordance of biological replicates	D
Number and stage (RT or qPCR) of technical replicates	E	3， line154
Repeatability (intra-assay variation)	E	SD, shown in supplemental data s9
Reproducibility (inter-assay variation, %CV)	D
Power analysis	D
Statistical methods for result significance	E	t-test， line161
Software (source, version)	E	microsoft excel 2020; prism graphpad， refer to line160
Cq or raw data submission using RDML	D
Table 1. MIQE checklist for authors, reviewers and editors. All essential information (E) must be submitted with the manuscript. Desirable
information (D) should be submitted if available. If using primers obtained from RTPrimerDB, information on qPCR target, oligonucleotides,
protocols and validation is available from that source.
*: Assessing the absence of DNA using a no RT assay is essential when first extracting RNA. Once the sample has been validated as
RDNA-free, inclusion of a no-RT control is desirable, but no longer essential.
**: Disclosure of the probe sequence is highly desirable and strongly encouraged. However, since not all commercial pre-designed assay
vendors provide this information, it cannot be an essential requirement. Use of such assays is advised against.
